# Supplementary material for: Identification of Deregulated Pathways, Key Regulators, and Novel miRNA-mRNA Interactions in HPV-Mediated Transformation
Source: MDPI journal article supplement (doi:10.3390/cancers12030700), 2020-03-16
Supplement: s1 [file s1]

# Supplementary Materials: Identification of Deregulated Pathways, Key Regulators, and Novel miRNA-mRNA Interactions in HPV-Mediated Transformation

Iris Babion, Viktorian Miok, Annelieke Jaspers, Angelina Huseinovic, Renske D.M. Steenbergen, Wessel N. van Wieringen and Saskia M. Wilting

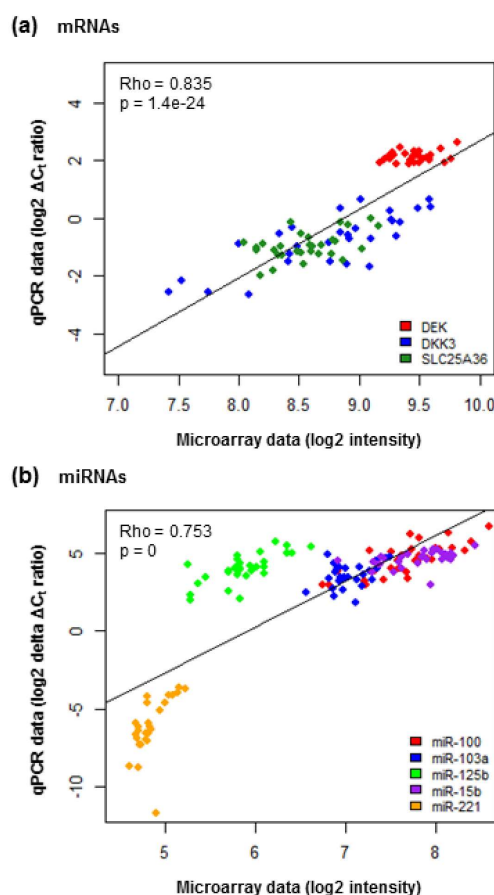

**Figure S1.** Technical validation of microarray results by qRT-PCR. **(a)** mRNAs DEK, DKK3, SLC25A36, and **(b)** miRNAs miR-100-5p, miR-103a-3p, miR-125b-5p, miR-15b-5p, and miR-221-5p. The Spearman correlation coefficient (Rho) and associated p-value (p) are indicated.

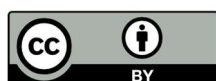

© 2020 by the authors. Licensee MDPI, Basel, Switzerland. This article is an open access article distributed under the terms and conditions of the Creative Commons Attribution (CC BY) license (<http://creativecommons.org/licenses/by/4.0/>).
